# Supplementary material for: Chemically driven isothermal closed space vapor transport of MoO2: thin films, flakes and in situ tellurization
Source: Royal Society of Chemistry journal article supplement (doi:10.1039/c8tc01685b), 2018-01-01

I. Temporal behaviour of temperature during growth

The temperature was measured with thermocouples located in the front (red) and in the rear (black) regions of the graphite crucible. The absence of temperature gradients can be noted. (Fig. S.1)

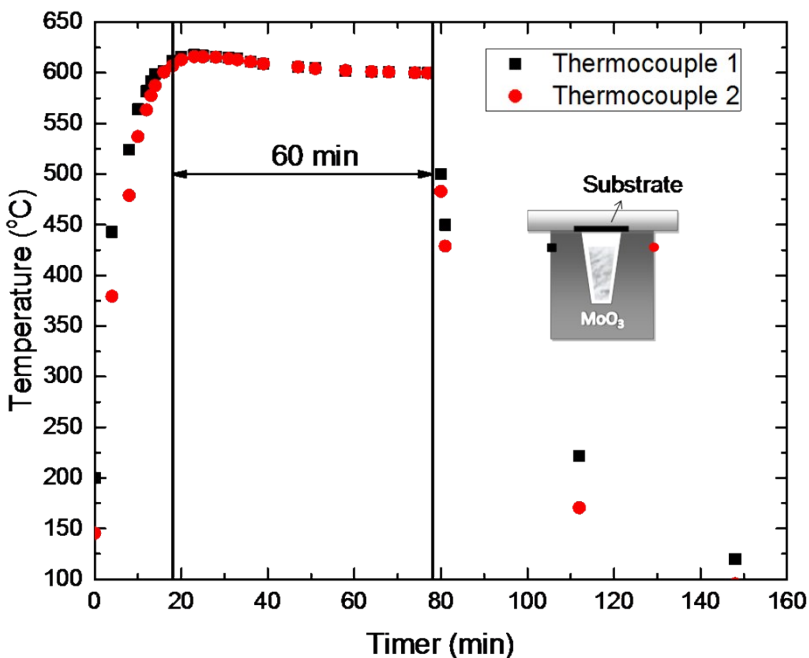

II. Thickness calculation from the IBS spectrum.

IBS simulation provides the atomic areal density (a.d.) in  $\text{atm}/\text{cm}^2$ . To convert this value to thickness we used the relation:

$$t = \frac{a.d.}{\rho_{\text{MoO}_2}^{\text{at}}}$$

$\rho_{\text{MoO}_2}^{\text{at}}$  stands for the atomic density for  $\text{MoO}_2$  and  $t$  is the thickness.

The atomic density was calculated using:

$$\rho_{\text{MoO}_2}^{\text{at}} = \frac{3 * \rho_{\text{MoO}_2}}{M_{\text{MoO}_2} N_{\text{Av}}}$$

in which  $\rho_{\text{MoO}_2}$ ,  $M_{\text{MoO}_2}$  and  $N_{\text{Av}}$  are the density, the formula unit mass, and the Avogadro number. The factor 3 in the numerator represent the number of atoms in the formula unit of  $\text{MoO}_2$ .

The values of the different constants are:

$$M_{\text{MoO}_2} = 127.92; \rho_{\text{MoO}_2} = 6.47 \text{ g/cm}^3$$

IBS spectrum for a sample grown onto a Si substrate. (Fig. S.2)

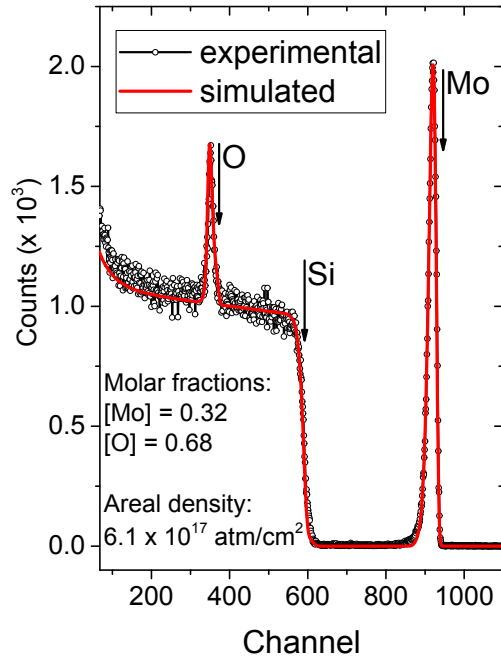

### III. Graphite boat for the $\text{MoO}_2$ growth and in-situ tellurization (Fig. S.3)

The substrate is exposed first to the  $\text{MoO}_3$  powder to form the  $\text{MoO}_2$  film or flakes and then to the Te vapours for tellurization and formation of  $\text{MoTe}_2$

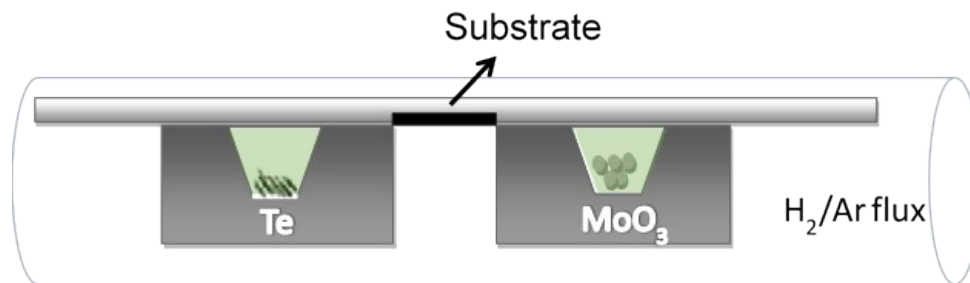

Supplement: c8tc01685b1.pdf [file c8tc01685b1.pdf]
